# Supplementary material for: Modified cereal bran (MCB) from finger millet, kodo millet, and rice bran prevents high-fat diet-induced metabolic derangements
Source: Royal Society of Chemistry journal article supplement (doi:10.1039/d2fo02095e), 2022-12-26
Supplement: d2fo02095e1.pdf [file d2fo02095e1.pdf]

Supplementary

Table 1: Nutritional information of the modified cereal bran mixed in the HFD diet.

| Nutrients                   | mFMB (%)     | mKMB (%)     | mRB (%)      |
|-----------------------------|--------------|--------------|--------------|
| <b>Protein</b>              | 15.85        | 3.15         | 10.44        |
| <b>Carbohydrate</b>         | 62.85        | 89.69        | 74.24        |
| <b>Fat</b>                  | 0.8          | <b>0.47</b>  | <b>3.59</b>  |
| <b>Total dietary fibers</b> | <b>49.45</b> | <b>65.80</b> | <b>54.03</b> |
| <b>Ash</b>                  | 5.38         | 3.50         | 5.84         |

Table 2: Experimental diets used in the study (w/w) %.

| Ingredients (g)       | HFD  | HFD+mFMB | HFD+mKMB | HFD+mRB | HFD+mCB |
|-----------------------|------|----------|----------|---------|---------|
| NPD                   | 36.5 | 32.85    | 32.85    | 32.85   | 32.85   |
| Milk casein           | 25   | 22.5     | 22.5     | 22.5    | 22.5    |
| Vitamin & mineral mix | 6.0  | 5.4      | 5.4      | 5.4     | 5.4     |
| DL-methionine         | 0.3  | 0.27     | 0.27     | 0.27    | 0.27    |
| Sodium chloride       | 0.1  | 0.09     | 0.09     | 0.09    | 0.09    |
| Lard                  | 32   | 28.8     | 28.8     | 28.8    | 28.8    |
| mFMB                  | 0    | 10       | 0        | 0       | 3.3     |
| mKMB                  | 0    | 0        | 10       | 0       | 3.3     |
| mRB                   | 0    | 0        | 0        | 10      | 3.3     |
| Energy (kcal/g)       | 5.26 | 4.95     | 4.98     | 4.99    | 4.97    |

Table 3: Effect of high-fat diet and bran supplementation diets on the average weight of different organs.

| Treatments | WAT         | Liver        | Kidney       | BAT          | Spleen      | Pancreas      | Colon     |
|------------|-------------|--------------|--------------|--------------|-------------|---------------|-----------|
| Control    | 0.35±0.04   | 1.06±0.03    | 0.30±0.01    | 0.09±0.006   | 0.09±0.01   | 0.09±0.01     | 0.76±0.03 |
| HFD        | 1.27±0.24** | 1.27±0.10*   | 0.42±0.02*** | 0.17±0.03*** | 0.13±0.02*  | 0.16±0.006*** | 0.46±0.04 |
| mFMB       | 0.71±0.12   | 0.96±0.06##  | 0.33±0.02##  | 0.09±0.01    | 0.10±0.02#  | 0.12±0.07     | 0.49±0.06 |
| mKMB       | 0.86±0.20   | 0.99±0.13#   | 0.33±0.02##  | 0.15±0.01    | 0.09±0.02## | 0.13±0.01     | 0.54±0.04 |
| mRB        | 0.88±0.16   | 0.81±0.04### | 0.28±0.01### | 0.08±0.01    | 0.07±0.01#  | 0.08±0.01     | 0.38±0.03 |
| mCB        | 0.58±0.16   | 0.97±0.05##  | 0.34±0.02#   | 0.11±0.01    | 0.09±0.01#  | 0.10±0.01     | 0.43±0.03 |

All data were represented as mean ± SEM and were analyzed by one-way ANOVA followed by Tukey's multiple comparisons. \*p≤0.05, \*\*p≤0.01, \*\*\*p≤0.001 is significant to control. #p≤0.05, ##p≤0.01, ###p≤0.001 is significant to HFD.

Table 4. List of primers used for qPCR

| No. | Primer ID     | Forward primer 5'-3' | Reverse primer 5'-3'  |
|-----|---------------|----------------------|-----------------------|
| 1   | <i>β-act</i>  | TGTTACCAACTGGGACGACA | GGGGTGTGAAGGTCTCAAA   |
| 2   | <i>Occ</i>    | GGCAAGCGATCATACCCAGA | TCATAGTGGTCAGGGTCCGT  |
| 3   | <i>ZO1</i>    | TAAGTTGGGGAGGGAGGGTC | GGTAAGGCATTCTGCTGGT   |
| 4   | <i>Cldn-2</i> | TCACACTTGAGTCATCGCCC | TCCCACCTCAAGCACAATCC  |
| 5   | <i>Cldn-4</i> | GACCTAGAAGCAGCCCAGTG | CTCAGAGGGGCCAACTCAAG  |
| 6   | <i>Muc1</i>   | GCCGAAAGAGCTATGGGCA  | CTGCCATTACCTGCCGAAAC  |
| 7   | <i>Muc2</i>   | GGCCTCACCACCAAGCGTCC | TGGGCTGGCAGGTGGGTTCT  |
| 8   | <i>Muc3</i>   | AGTGCTGTTGGTGATCCTCG | AGAGTCCAGGGGCATGTAGT  |
| 9   | <i>Muc4</i>   | TTGCACCTGTCCCCCTGCCT | GTTCCGCCACCGAGGCGTTGA |
| 10  | <i>GCK</i>    | GTCGTTGACTCTGGTAGAGC | CCAACTTCTGAGCCTTCTGG  |
| 11  | <i>GSK3</i>   | GCGGGACCCAAATGTCAAAC | GTCCACGGTCTCCAGCATTA  |

|    |                |                       |                      |
|----|----------------|-----------------------|----------------------|
| 12 | <i>G6PC</i>    | CACATCCGGGGCATCTACAA  | GCTGGCAAAGGGTGTAGTGT |
| 13 | <i>PCK1</i>    | TGGAAGGTCTGAATGTGTGGG | CAGTAAACACCCCCATCGCT |
| 14 | <i>ATGL</i>    | TGGAGAGGAGGATCAATTGCA | CAAGCGGATGGTGAAGGACA |
| 15 | <i>HSL</i>     | GACCATCAACCGACCAGGA   | GTTGCGTTTGTAGTGCTCCC |
| 16 | <i>LPL</i>     | CTCGCTCTCAGATGCCCTA   | AGCAGTTCTCCGATGTCCAC |
| 17 | <i>IR</i>      | TTTTTGTCCCCAGGCCATCC  | ATGCGGTACCCAGTGAAGTG |
| 18 | <i>IRS2</i>    | CACAACCTATCGTGGCACCT  | AAGGTCTCTGAACTGTGGCG |
| 19 | <i>GLUT4</i>   | CTATGCTGGCCAACAATGTCT | GACGATGGCCAGTTGGTTG  |
| 20 | <i>CREB</i>    | CAGCACCCACTAGCACCATT  | AGCACTGCCACTCTGTTCTC |
| 21 | <i>ADIPOQ</i>  | ATCGCTCAGGCTTCAGTGTG  | AACGGCCTTGTCCTTCTTGA |
| 22 | <i>CRTC1</i>   | TGCCAACGTGAACCAGATT   | GTCGCCCATGCTTGTCTACT |
| 23 | <i>CRTC2</i>   | GGTTGGTGGAAACGGGTACAA | TCCTGTTAAGTGCAGACGGC |
| 24 | <i>SREBP</i>   | GTACCTGCGGGACAGCTTA   | GGTCATGTTGGAAACCAC   |
| 25 | <i>MGL L</i>   | CGGAACAAGTCGGAGGTTGA  | TGTCCTGACTCCGGGATGAT |
| 26 | <i>SCD-1</i>   | ATCGCCCCTACGACAAGAAC  | GTTGATGTGCCAGCGGTACT |
| 27 | <i>DGPAT-2</i> | CTGCATCTTCCATGGCCGAG  | TTTCTGGGTCTGGGTGCTC  |
| 25 | <i>FOXO1</i>   | AATTCGGTCATGCCAGCGTA  | TAAAGGTGTCTTCACGGGGG |

**Table 5. List of primers used for qPCR in bacterial abundance estimation.**

| No. | Primer ID                | Forward primer 5'-3'              | Reverse primer 5'-3'                 |
|-----|--------------------------|-----------------------------------|--------------------------------------|
| 1   | <i>Total Bacteria_d</i>  | GCAGGCCTAACACATGCAAGTC            | CTGCTGCCTCCCGTAGGAGT                 |
| 2   | <i>Bacteroidetes_p</i>   | ACGCTAGCTACAGGCTTAACA             | ACGCTACTTGGCTGGTTCA                  |
| 3   | <i>Firmicutes_p</i>      | GCGTGAGTGAAGAAGT                  | CTACGCTCCCTTTACAC                    |
| 4   | <i>Akkermansia_g</i>     | AACGAACGCTGGCGGCGTGGAT<br>AAGACAT | CATCCCAGTTACCAGTCTCAC<br>CTTAGGACCCT |
| 5   | <i>Bacteroides_g</i>     | GAGAGGAAGGTCCCCCAC                | CGCKACTTGGCTGGTTCAG                  |
| 6   | <i>Bifidobacterium_g</i> | GATTCTGGCTCAGGATGA                | CTGATAGGACGCGACCCC                   |
| 7   | <i>Clostridium_g</i>     | CGGGTGAGTAACGCGTGAGT              | AACCTCTCAGTCCGGCTACC                 |

|    |                          |                      |                               |
|----|--------------------------|----------------------|-------------------------------|
| 8  | <i>Fecalibacterium_g</i> | GAGGAAGATAATGACGGTAC | ACCTCTGCACTACTCAAGA           |
| 9  | <i>Roseburia_g</i>       | GCGGTRCGGCAAGTCTGA   | CCTCCGACACTCTAGTMCGA          |
| 10 | <i>Lactobacillus_g</i>   | CACCGCTACACATGGAG    | AGCAGTAGGGAATCTTCCA           |
| 11 | <i>Prevotella_g</i>      | GGTGTCGGCTTAAGTGCCAT | CGGAYGTAAGGGCCGTGC            |
| 12 | <i>Eubacterium-g</i>     | GCTGTGAAGCCGAGCAAATC | GGTTAGGTCACTGGCTTCGG          |
| 13 | <i>Ruminococci-g</i>     | GGCGGCYTRCTGGGCTTT   | CCAGGTGGATWACTTATTGTG<br>TTAA |
| 14 | <i>Lachnospiraceae-g</i> | CGGTACCTGACTAAGAAGC  | AGTTTYATTCTTGCGAACG           |

\_d = domain, \_p = phylum, \_g = genus
